# Supplementary material
Source: publisher figshare collection journal article supplement (https://wiley.figshare.com/ndownloader/files/5641116)
Supplement: Supplementary file 1 [file 5641116]

Ecological Archives M077-008-A2


### *Ecological Archives* M077-008-A2

### **Erin Conlisk, Michael Bloxham, John Conlisk, Brian Enquist, and John Harte. 2007. A new class of models of spatial distribution. *Ecological Monographs* 77:269–284.**

Appendix B. Derivation of Theorem 2.

**Theorems. 2.1 and 2.2**. Explained in the text.

**Theorem 2.3**. Using the Sequence 2 viewpoint, consider any cell of the index *i* grid. Its abundance *n* is acquired from its predecessor cell in the index *i*–1 grid, hence

|  |
| --- |
|  |

Since the predecessor cannot pass on more individuals than it holds, the sum begins at *q* = *n*; and, since the predecessor could be holding all *n*0 individuals, the sum ends at *q* = *n*0. The summand probability on the right can be broken into a product of two probabilities, yielding

|  |
| --- |
|  |

On the left is . On the right are  and , where the latter equals *F*(*a*,*n*)*F*(*a*,*q*–*n*)/*F*(2*a*,*q*) by Theorem 1.3. Filling in this notation yields Theorem 2.3.

**Theorem 2.4**. Summing out all but one cell from the multivariate PDF, as was done for the single-division model, appears intractable. Hence we instead solve the recursion in 2.3. If the index *i* univariate probabilities are arrayed as a row vector

|  |
| --- |
|  |

the recursion can be expressed in vector-matrix form as

|  |
| --- |
|  |

where  is the univariate probability matrix (for *c* = 2) defined above Theorem 1 and characterized in Theorem 1.4. If the fixed indices  are suppressed, this version of the recursion takes the compact form

|  |  |
| --- | --- |
| **P** *i* = **P** *i* –1**Q**, | (B.1) |

which can be recognized as the state probability equation of a Markov chain. The chain, with index *i*, is the sequence of cells from the initial area at *i* = 0 to the cell of interest at the final value of *i*. The states are the possible numbers of individuals in a cell (a number from 0 to *n*0). **P***i* arrays the state probabilities as a row vector; **Q** is the transition probability matrix; and (B.1) governs the evolution of **P***i*. Back substitution yields the solution **P***i* = **P**0**Q***i*. The initial condition is **P**0 = (0,...,0,1), which states that the chain starts with all *n*0 individuals in the whole area at index *i* = 0. Thus, **P***i* = **P**0**Q***i* can be written **P***i* = [last row of **Q***i*]. By Theorem 1.4, . Writing out the right side and invoking the property of **U** that **UU** = **I** yields  and thus . Substituting from the definitions of **U** and  yields the vector **P***i*, whose *n*th element (starting from *n* = 0) is Theorem 2.4.

**Theorem 3**. The derivations of Theorem 3 closely follow those of Theorem 2.

---

  

[Back to M077-008]
